# Supplementary material for: Radium-223 Treatment Increases Immune Checkpoint Expression in Extracellular Vesicles from the Metastatic Prostate Cancer Bone Microenvironment
Source: Oxford University Press journal article supplement (doi:10.1158/1078-0432.ccr-20-4790), 2021-03-22
Supplement: 10780432ccr204790-sup-256999_3_supp_6988158_qq0w3d.docx [file 10780432ccr204790-sup-256999_3_supp_6988158_qq0w3d.docx]

**Supplementary Table 1**

| BASELINE PATIENT CHARACTERISTICS | |
| --- | --- |
| Treated (# of pts) | **25** |
| Median Age, years (range) | **66 (46-84)** |
| Race  White  Other | **20 (80%)**  **5 (20%)** |
| ECOG, # of pts  0  1 | **12 (48%)**  **13 (52%)** |
| PSA (ng/ml)  Median (range) | **26.9 (<0.1-4,170)** |
| Total Alkaline Phosphatase, Nl 38-126 U/L  Median (range) | **124 (64-681)** |
| LDH, Nl 313-618 U/L  Median (range) | **489 (370-1098)** |
| Hemoglobin, Nl 14-18 gm/dL  Median (range) | **12.0 (8.8-15.1)** |
| Albumin, Nl 3.5-4.7 gm/dL  Median (range) | **4.3 (3.7- 4.9)** |
| Prior Taxane, # of pts | **18 (72%)** |
| Prior Abiraterone and/or Enzalutamide  # of pts | **20 (80%)** |
| Gleason Score, # of pts  7  8  9  10  Unknown | **3**  **5**  **14**  **1**  **2** |
| Extent of Bone Metastases, # of pts  <20  >20 | **8 (32%)**  **17 (68%)** |
| Median Follow Up, months | **27.6** |

**Supplementary Table 2**

| **# of Cycles** | **Favorable OS**  **(# of patients)** | **Unfavorable OS**  **(# of patients)** |
| --- | --- | --- |
| 6 | 12 | 7 |
| 5 | 1 | 1 |
| 4 | - | - |
| 3 | - | 2 |
| 2 | - | 1 |
| 1 | - | 1 |

**Supplementary Table 3**

| **OS (months)** | **Censor 1=Died 0=Alive** |  |
| --- | --- | --- |
| 3.3 | 1 | **Unfavorable** |
| 5.3 | 1 |
| 6.3 | 1 |
| 7.9 | 1 |
| 8.5 | 1 |
| 12.6 | 1 |
| 15.3 | 1 |
| 16.0 | 1 |
| 18.1 | 1 |
| 18.2 | 1 |
| 18.9 | 1 |
| 19.4 | 1 |
| 23.1 | 1 | **Favorable** |
| 24.3 | 1 |
| 24.9 | 1 |
| 27.2 | 0 |
| 31.4 | 1 |
| 35.5 | 1 |
| 36.3 | 0 |
| 36.8 | 0 |
| 36.9 | 0 |
| 38.7 | 0 |
| 39.5 | 0 |
| 42.8 | 0 |
| 43.1 | 0 |
